# Supplementary material
Source: PubMed Central journal article supplement (PMC9158278)
Supplement: 12884_2022_4735_MOESM2_ESM.pdf [file 12884_2022_4735_MOESM2_ESM.pdf]

# Labour Observation

Record ID \_\_\_\_\_

**Instructions:**

**Greet the facility Sister in charge (SIC)/Officer in charge (OIC). Brief them about the observation and gain their consent. Provide them with information about the study.**

**Key points to include:**

- **This study is supported by the East New Britain Provincial Government and National Department of Health**
- **All efforts are made to ensure answers are anonymous**
- **Information collected will be used to improve planning and support of health services**
- **Burnet Institute and PNG IMR are conducting the study.**

**Ask the staff in labour ward/birth suite about any women in labour and to notify you of any pending births. The aim of the labour observation is to observe pregnant women in established labour who are giving birth in study facilities. Women will be observed throughout their labour, childbirth and until 1 hour postpartum (within working hours).**

**Move about the room to clear a clear view of the woman without obstructing the birth attendant(s), speaking or intervening.\***

**If questioned by patient family - please provide Tok Orait Pepa for information sheet use.**

**Pre-screening eligibility questions:**

1. Date: \_\_\_\_\_

2. Woman initials: \_\_\_\_\_

3. Hospital:

- Nonga    St Mary's    Kerevat    Napapar    Pomio    Other

Others, please specify.  
\_\_\_\_\_

4. Woman's age (as recorded in medical record):  
\*Women under 16 years are ineligible\*

---

5. Woman admitted for childbirth

Yes  No (If not, not eligible)

---

6. Woman transferred to another hospital immediately, or taken straight to theatre (for caesarean section)?

Yes (If yes, not eligible)  No

---

7. Woman is presenting for abortion or abortion-related complications, miscarriage, fetal death in-utero, ectopic pregnancy, antenatal or postnatal complications:

Yes (If yes, not eligible)  No

---

8. Pre-screening eligibility. Is the women eligible?

Yes  No

---

9. Consent received from sister in charge/officer in charge.

Yes  No

---

### General information about patient

10. Date observation commenced:

\_\_\_\_\_

---

11. Time observation commenced:

\_\_\_\_\_

---

12. Date and time of admission to labour ward:

\_\_\_\_\_

---

### Obstetric and medical characteristics (Collect from patient record):

13. Number of pregnancies including current:

\_\_\_\_\_

---

14. Number of previous births excluding current:

\_\_\_\_\_

---

15. Number of previous caesarean sections (if any):

\_\_\_\_\_

---

16. Current pregnancy:

Singleton  Multiple

---

17. HIV status

Negative  Positive  Unknown

---

### Pre-Birth Preparation

---

18. Did the accoucher take actions to consider the room temperature? (i.e. turn off fans/air conditioning):

Yes  No  Don't know

---

19. Did the accoucher wash their hands prior to touching any sterile/clean surface areas/handling equipment?

Yes  No  Don't know

---

20. Did the accoucher prepare the newborn resuscitation area?

Yes  No  Don't know

---

21. Did the accoucher check if newborn bag and masks were functional?

Yes  No  Don't know

---

22. Did the accoucher arrange equipment for the birth - i.e. forceps, cord clamp/ties etc?

Yes  No

---

### Birth

---

23. Was the labour spontaneous or induced?

Spontaneous  Induced

---

24. Was augmentation of labour used (artificial rupture of membranes or an oxytocin drip to speed up labour)?

No  Yes  Unknown

---

25. Was perineal shaving performed?

No  Yes  Unknown

---

26. Was an enema performed?

No  Yes  Unknown

---

27. Did the woman have an episiotomy?

Yes  No (Go to 29)

---

---

28. If yes, was the procedure explained and woman agreed to the procedure?

- Not explained, did not agree    Not explained, agreed    Explained, did not agree  
 Explained and agreed    Refused procedure    Unknown
- 

29. Did a perineal tear occur?

- No tear (Skip to 32)    First degree tear    Second degree tear    Third- or fourth-degree tear  
 Yes but not sure which type    Unknown
- 

30. Perineal repair or suture performed?

- No    Yes    Unknown
- 

31. Local anaesthetic used during perineal repair

- No    Yes    Unknown
- 

32. Was the woman told she could move around and get off the bed during labour?

- Not told, did not mobilize    Not told, mobilized    Told, did not mobilize    Told and mobilized  
 Unknown
- 

33. Was the woman instructed to clean up her own blood, urine, faeces or amniotic fluid?

- No    Yes    Unknown
- 

34. Was the woman's companion or family members instructed to clean up her blood, urine, faeces or amniotic fluid?

- No    Yes    Unknown
- 

35. Maternal admission to intensive care.

- No    Yes    Unknown
- 

36. Maternal transfer to another hospital.

- No    Yes    Unknown
- 

37. Maternal status at end of observation.

- Alive    Dead    Unknown
- 

38. Mode of childbirth

- Non-instrumental vaginal birth (Skip to 40)  
 Instrumental vaginal birth (vacuum/forceps) (Skip to 41)  
 Caesarean section (Skip to 39)
- 

39. If yes, was the procedure (caesarean section) explained and woman agreed to the procedure?

- Not explained, did not agree  
 Not explained, agreed  
 Explained, did not agree  
 Explained and agreed  
 Refused procedure  
 Unknown

---

40. For women with a non-instrumental vaginal birth (ie. normal birth), what was the birth position?

- Dorsal/supine (flat on her back)
- Lithotomy (flat on her back with her feet in the stirrups)
- On all fours (hands and knees position)
- Squatting or sitting
- Lying on her side
- Unknown
- Other (please specify)

---

Others, please specify.

---

---

41. Total # of vaginal exams observed: (number)

---

---

42. Before a vaginal examination, did the staff inform the woman why a vaginal exam was needed and obtained her permission?

- Did not have any vaginal exam during observation period
- Not informed, permission not obtained
- Not informed, permission obtained
- Informed, permission not obtained
- Informed and permission obtained
- Refused examination
- Unknown

---

### Immediate Postpartum Newborn activities

---

43. Singleton or multiple birth

- Singleton (1 baby)
- Multiples (2 or more babies)
- Unknown/don't know/missing

---

44 a) Sex of the baby (baby 1)

- Female
- Male
- Intersex
- Unknown

---

45 a). Baby status at birth (baby 1)

- Baby alive at birth (Skip to 48)
- Fresh stillbirth (skip to 46 & 47)
- Macerated stillbirth (baby has peeling skin) (Skip to 46 & 47)
- Unknown/don't know

---

46 a) Was the mother informed that her baby was stillborn or had died? (Baby 1)

- Yes
- No
- Unknown

---

47 a) Was the mother able to see the deceased or stillborn baby if she wished to? (Baby 1)

Yes  No  Unknown

---

48 a) Did the baby start breathing on their own ? (Baby 1)

Yes  No, needed assistance

---

49 a) What assistance was needed? (Baby 1)

Stimulation (rubbing/drying with cloth)  Suctioning of mouth/nose  Baby needed artificial breaths (mouth to mask or bag and mask)  Other measures than those listed above (Please specify)

---

Others, please specify.

\_\_\_\_\_

---

50 a) Was the baby dried after birth? (Baby 1)

Yes  No  Unknown

---

51 a) Was the baby placed on mother's chest (direct skin-to-skin)? (Baby 1)

Yes  No  Unknown

---

52 a) Was the baby covered with a cloth or blanket? (Baby 1)

Yes  No  Unknown

---

53 a) Was the mother injected with oxytocin after the birth of the baby? (Baby 1)

Yes  No  Unknown

---

54 a) Did the accoucher check for cord pulsations before clamping the umbilical cord, clamped after pulsations stopped? (Baby 1)

Yes  No  Unknown

---

55 a) Was the mother encouraged to start breastfeeding? (Baby 1)

Yes  No  Unsure

---

56 a) Did the baby start breastfeeding? (Baby 1)

Yes  No  Unsure

---

57 a) Was breastfeeding advice provided to the mother? (baby 1)

Yes  No  Unsure

---

58 a) Was the baby given Vit K? (Baby 1)

Yes  No  Unsure

---

59 a) Was the baby given Hep B? (baby 1)

- Yes  No  Unsure
- 

60 a) Baby status at end of observation period. (Baby 1)

- Alive and well  Baby admitted to special care baby unit  Very early infant death (birth to 1 hour postpartum)
- 

61 a) During the time of observation after birth where was the baby for most of the time? (Baby 1)

- Held by the mother, skin to skin  
 Held by the mother, not skin to skin  
 On the mother's bed  
 Held by a family member  
 Held by a birth attendant  
 In a cot in the same room as the mother, within mother's reach.  
 In a cot in the same room as the mother, not in mother's reach.  
 On a neonatal resuscitaire  
 In a neonatal nursery  
 Other (please specify)
- 

Others, please specify.

\_\_\_\_\_

---

44 b) Sex of the baby (baby 2)

- Female  
 Male  
 Intersex  
 Unknown
- 

45 b). Baby status at birth (baby 2)

- Baby alive at birth (Skip to 48)  
 Fresh stillbirth (skip to 46 & 47)  
 Macerated stillbirth (baby has peeling skin) (skip to 46 & 47)  
 Unknown/don't know
- 

46 b) Was the mother informed that her baby was stillborn or had died? (Baby 2)

- Yes  No  Unknown
- 

47 b) Was the mother able to see the deceased or stillborn baby if she wished to? (Baby 2)

- Yes  No  Unknown
- 

48 b) Did the baby start breathing on their own ? (Baby 2)

- Yes  No, needed assistance
-

---

49 b) What assistance was needed? (Baby 2)

- Stimulation (rubbing/drying with cloth)    Suctioning of mouth/nose    Baby needed artificial breaths (mouth to mask or bag and mask)    Other measures than those listed above (Please specify)

---

Others, please specify.

---

---

50 b) Was the baby dried after birth? (Baby 2)

- Yes    No    Unknown

---

51 b) Was the baby placed on mother's chest (direct skin-to-skin)? (Baby 2)

- Yes    No    Unknown

---

52 b) Was the baby covered with a cloth or blanket? (Baby 2)

- Yes    No    Unknown

---

53 b) Was the mother injected with oxytocin after the birth of the baby? (Baby 2)

- Yes    No    Unknown

---

54 b) Did the accoucher check for cord pulsations before clamping the umbilical cord, clamped after pulsations stopped? (Baby 2)

- Yes    No    Unknown

---

55 b) Was the mother encouraged to start breastfeeding? (Baby 2)

- Yes    No    Unsure

---

56 b) Did the baby start breastfeeding? (Baby 2)

- Yes    No    Unsure

---

57 b) Was breastfeeding advice provided to the mother? (baby 2)

- Yes    No    Unsure

---

58 b) Was the baby given Vit K? (Baby 2)

- Yes    No    Unsure

---

59 b) Was the baby given Hep B? (baby 2)

- Yes    No    Unsure

---

60 b) Baby status at end of observation period. (Baby 2)

- Alive and well    Baby admitted to special care baby unit    Very early infant death (birth to 1 hour postpartum)



---

61 b) During the time of observation after birth where was the baby for most of the time? (Baby 2)

- Held by the mother, skin to skin
- Held by the mother, not skin to skin
- On the mother's bed
- Held by a family member
- Held by a birth attendant
- In a cot in the same room as the mother, within mother's reach.
- In a cot in the same room as the mother, not in mother's reach.
- On a neonatal resuscitaire
- In a neonatal nursery
- Other (please specify)

---

Others, please specify.

---

**The next section of the observation may be performed outside of the labour room/birth suite. Take the time to sit down and think through the events observed and respond based on what you saw and heard**

**Respectful and dignified care**

62. Did the woman have a birth attendant present during labour?

- Yes - all of the time    Yes - some of the time    No

---

63. If yes, who was the attendant? (Tick all that apply)

- Midwife
- Doctor
- Nurse
- HEO
- CHW
- Midwifery student
- Nursing student
- Medical student
- Don't know who they were

---

64. Did the woman have a birth attendant present when the baby was actually born?

- Yes    No

---

65. If yes, who was the attendant?

- Midwife
- Doctor
- Nurse
- HEO
- CHW
- Not sure

---

66. Did the birth attendant introduce themselves to the woman ?

Yes  No  Unsure

---

67. Did the birth attendant explain what was happening/provide information to the women at any stage during the labour or birth?

Yes  No  Unsure

---

68. Did the birth attendant invite the woman to ask any questions any stage during the labour or birth?

Yes  No  Unsure

---

69. Did the birth attendant encourage the woman during the labour?

Yes  No  Unsure

---

70. Was the woman offered to have a labour companion during labour and birth:

Yes  No  Unsure

---

71. Was there a companion present at any time during labour?

Yes  No  Unsure

---

72. Was there a companion present at the time of birth?

Yes  No  Unsure

---

73. Was the women offered pain relief and did she receive it?

Offered and received  Offered and not received  Not offered  Unknown

---

74. Did the woman request pain relief?

Requested, not received  Requested and received  Not requested  Unknown

---

75. Was the woman asked for her preferred birthing position?

Yes  No  Unsure

---

76. Were curtains, partitions, or other measures used to provide privacy for the woman throughout labour, childbirth and postpartum periods?

Yes - it was private  Yes - but the curtains did not close and could not provide privacy  
 No  Used during some but not all periods

---

77. Was the women offered any water or oral fluids during labour?

No  Yes  Unknown

---

78. Did the woman have easy access to water or oral fluids during labour?

No  Yes  Unknown

---

79. Was there easy access to toilet and shower facilities (i.e. in room, next to room)?

Yes  No

---

80. Any physical abuse? (tick all that apply)

- Slap
  - Forceful downward pressure on abdomen
  - Held down to the bed forcefully
  - Punch
  - Hit
  - Kick
  - Pinch
  - Gag
  - Tied to the bed
  - Other physical abuse
- 

81. Any verbal abuse? (tick all that apply)

- Shouted at
  - Scolded
  - Mocked
  - Insulted
  - Threatened with poor outcome for baby
  - Hissed at
  - Negative comments - her sexual activity
  - Threatened with medical procedure
  - Negative comments - her appearance
  - Threatened to withhold care
  - Negative comments - baby's appearance
  - Threatened with physical violence
  - Blamed woman for poor outcome
- 

82. Any discrimination? (tick all that apply)

- Province of origin
  - Economic circumstances
  - In relation to her age, eg. being made to feel that she was too young or too old to have a baby
  - Single status - eg. discriminated because she was not married
  - Level of education/literacy
  - Religion
  - HIV status
  - Other stigma/discrimination
- 

Others, please specify.

\_\_\_\_\_

---

Date observation ended:

\_\_\_\_\_

---

Time observation ended:

\_\_\_\_\_

---

Total time observed by research officer (mins):

\_\_\_\_\_

---
